# Supplementary material for: Involvement of cecropin B in the formation of the Aedes aegypti mosquito cuticle
Source: PubMed Central journal article supplement (PMC5703890; doi:10.1038/s41598-017-16625-6), 2017-11-27
Supplement: 41598_2017_16625_MOESM1_ESM.pdf [file 41598_2017_16625_MOESM1_ESM.pdf]

## Supplementary Information

### Involvement of cecropin B in the formation of the *Aedes aegypti* mosquito cuticle

Wei-Ting Liu<sup>1</sup>, Wu-Chun Tu<sup>2</sup>, Chao-Hsiung Lin<sup>3</sup>, Ueng-Cheng Yang<sup>4</sup> & Cheng-Chen Chen<sup>1</sup>

<sup>1</sup>Institute of Microbiology and Immunology, National Yang-Ming University, Taipei, Taiwan, ROC.

<sup>2</sup>Department of Entomology, National Chung Hsing University, Taichung, Taiwan, ROC.

<sup>3</sup>Department of Life Sciences and Institute of Genome Sciences, National Yang-Ming University, Taipei, Taiwan, ROC.

<sup>4</sup>Institute of Biomedical Informatics, National Yang-Ming University, National Yang-Ming University, Taipei, Taiwan, ROC.

Correspondence and requests for materials should be addressed to

Dr. Cheng-Chen Chen

Institute of Microbiology and Immunology

National Yang-Ming University

155, Section 2, Li-Nong Street, Shipai

Taipei 112, Taiwan

Tel: +886-2-28267373

Fax: +886-2-28200565

mosquito@ym.edu.tw

## **Supplementary Materials and Methods**

### **In-Gel Digestion**

In-gel digestion was carried out as described by Liao *et al.* (2015)<sup>1</sup>. After electrophoresis, the sizes of proteins were estimated after staining with Coomassie Brilliant Blue G-250 (Bio-Rad, USA). The gel lanes were cut into ten equal fractions based on their molecular weight, and the slices were repeatedly washed in a solution of 1:125 mM NH<sub>4</sub>HCO<sub>3</sub>/50% (V/V) acetonitrile (ACN) until any stain was completely removed. After completely drying the gel fragments in a SpeedVac (Thermo Scientific, USA), the slices were rehydrated with 2% (V/V) β-mercaptoethanol/25 mM NH<sub>4</sub>HCO<sub>3</sub> and incubated at room temperature for 20 min in the dark to reduce the disulfide bounds. Following this reduction, the slices were incubated with an equal volume of 10% (V/V) 4-vinylpyridine in 1:125 mM NH<sub>4</sub>HCO<sub>3</sub>/50% (V/V) ACN for 20 min to alkylate the cysteine residues. The slices were then washed by soaking in 1 mL of 25 mM NH<sub>4</sub>HCO<sub>3</sub> for 10 min, dried in a SpeedVac for 20 min, and finally incubated with 100 ng of modified trypsin (Promega, Germany) in 25 mM NH<sub>4</sub>HCO<sub>3</sub> 37°C overnight. The tryptic digestion mixture was removed from the gel, dried in a SpeedVac and stored at -20°C.

### **Mass spectrometry analysis**

Mass spectrometry analysis was carried out as described by Liao *et al.* (2015)<sup>1</sup>. The tryptic peptides were resuspended in 0.1% (V/V) formic acid immediately before analysis and then separated using an online nano-acquity ultra performance liquid chromatography (UPLC) system (Waters, UK) coupled to a LTQ-Orbitrap Discovery mass spectrometer (MS) with a nano-electrospray ionization source (Thermo Scientific, USA). The peptides were separated using an Agilent C18

trapping cartridge (100 mm x 0.075 mm, particle size 3.5  $\mu\text{m}$ ) at a flow rate of 0.5  $\mu\text{L}$  per minute in a conjunction with a gradient elution solvent system: mobile phase A was water with 0.1% formic acid and mobile phase B was ACN with 0.1% formic acid. The peptides were eluted from the column using a linear gradient of 5% to 35% of solution B for 90 min, 35% to 95% solution B for 2 min, and 95% solution B for 10 min. The eluted peptides were ionized using a spray voltage of 2 kV and then introduced into the MS. MS dataset was obtained using a data-dependent acquisition method (isolation width: 2 Da), and a full MS survey scan ( $m/z$ : 200-2,000, resolution 30,000) at half maximum width; this was followed by a tandem MS ( $m/z$ : 200-2,000) scan of the six most intense ions (doubly charged ions and triply charged charge states). Fragment ions of each of the selected precursors were generated by collision-induced dissociation using helium gas at a collision energy of 3.5 eV.

### **Database search**

The liquid chromatography-tandem mass spectrometry raw dataset was analyzed using Xcalibur 2.0.7 SR1 (Thermo Scientific, USA), and then processed using in-house software within a Microsoft VBA environment. The resulting files were used to search against the NCBI's database (<https://www.ncbi.nlm.nih.gov/>) and the VectorBase website (<http://www.vectorbase.org>) using an in-house TurboSequest search server (ver. 27, rev. 11) (Thermo Scientific, USA). The following search parameters were incorporated: peptide mass tolerance (20 ppm); fragment ion tolerance (0.8 Da); enzyme set as trypsin; one missed cleavage allowed; and peptide charge (doubly charged ions and triply charged ions). Oxidation of methionine (+16 Da) and vinylpyridine alkylation of cysteine (+105.06 Da) were allowed as variable modifications. The TurboSequest results were filtered using criteria similar to those of

Liao *et al.* (2015)<sup>1</sup> and highly confident results required a DelCN value of  $\leq 0.1$ . At least two unique peptides needed to be matched with the Xcorr score for each peptide being  $> 2.5$ . The false-discovery rate was set 1.0%.

### **Supplementary References**

1. Liao, C. C. *et al.* Proteomics analysis to identify and characterize the molecular signatures of hepatic steatosis in ovariectomized rats as a model of postmenopausal status. *Nutrients*. **7**, 8752-8766 (2015).

**Supplementary Figure**

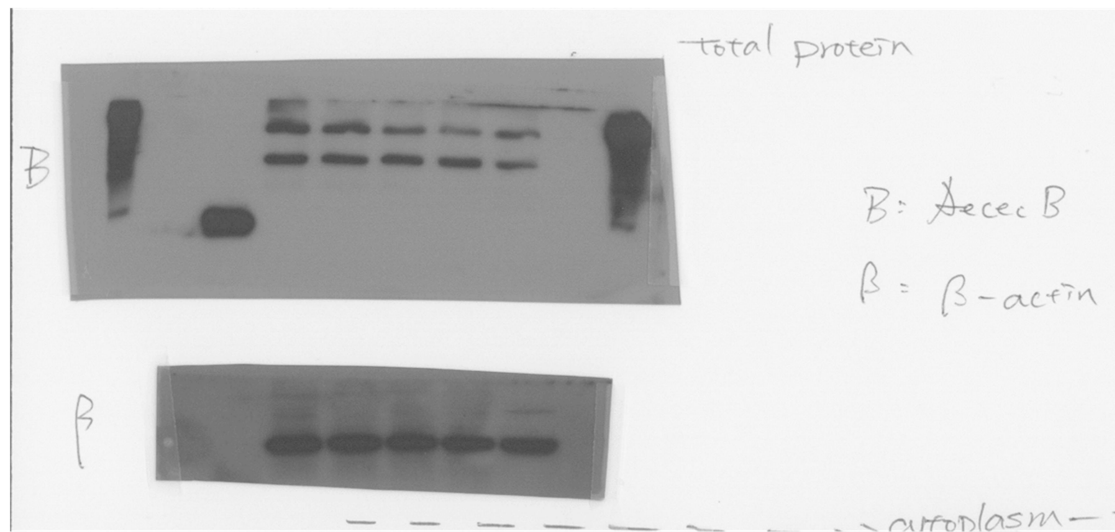

**Supplementary Figure S1. Full length blots of the Western data shown in the regular Figure 1c.**

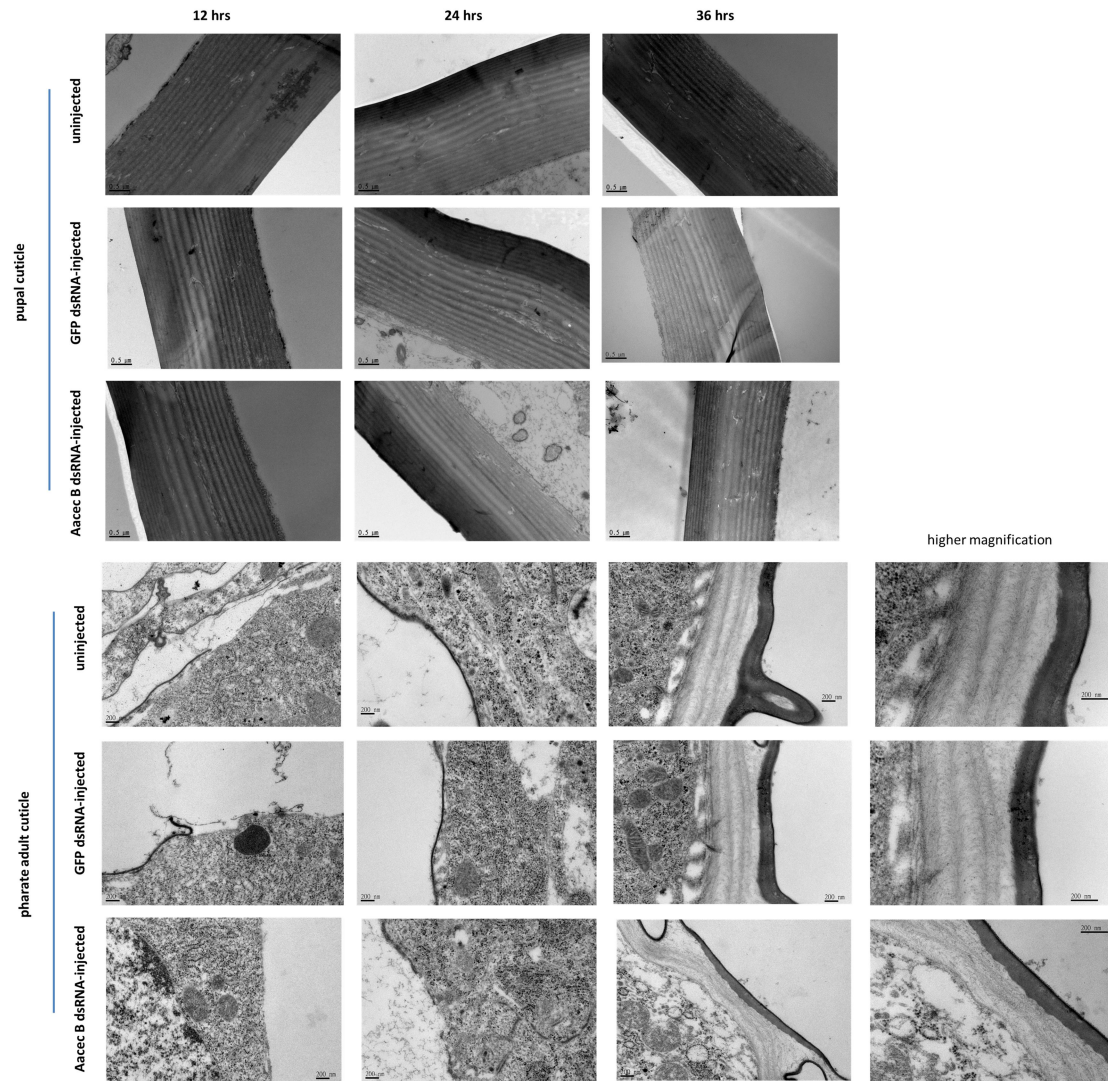

**Supplementary Figure S2. Full length transmission electron micrographs of the pupal cuticle and pharate adult cuticle of the uninjected control, GFP dsRNA-injected control and Aaec B dsRNA-injected *Ae. aegypti* pupae shown in the regular Figure 3.**

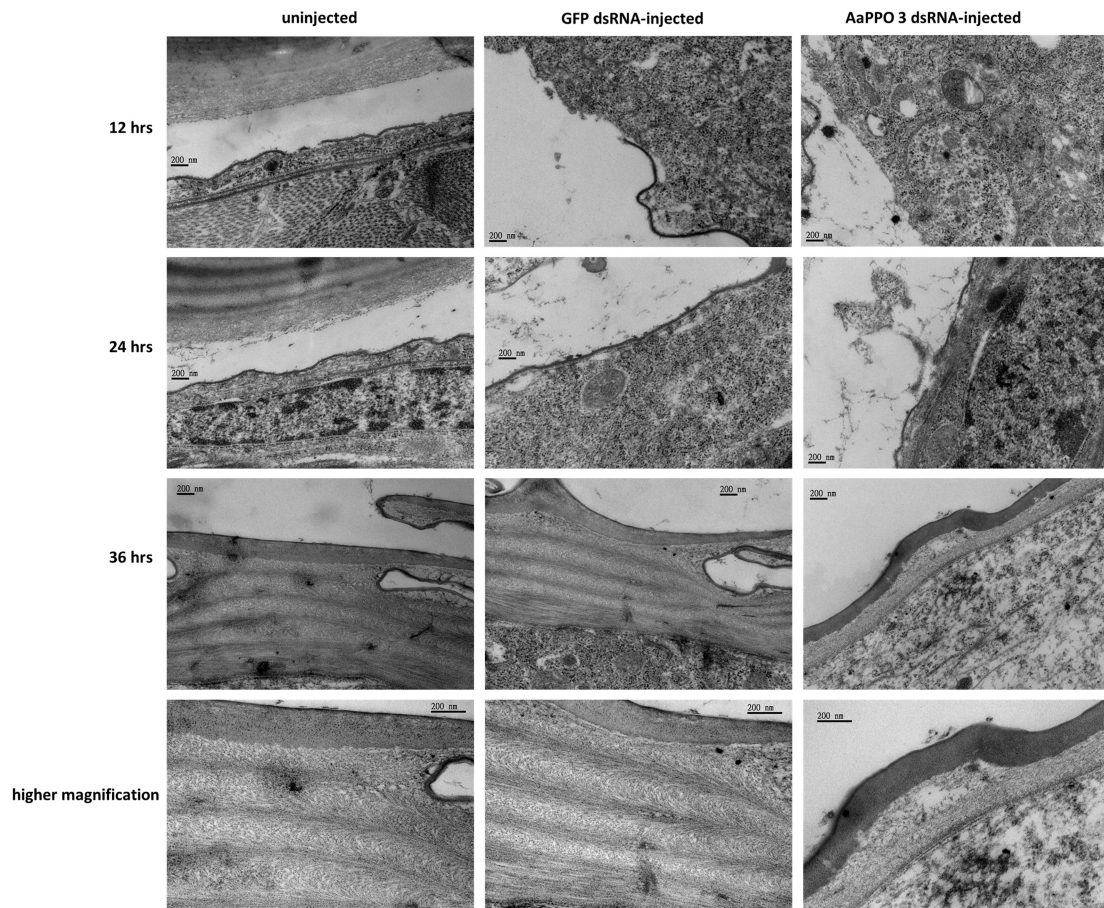

**Supplementary Figure S3. Full length transmission electron micrographs of the pharate adult cuticle of the uninjected control, GFP dsRNA-injected control and AaPPO 3 dsRNA-injected *Ae. aegypti* pupae shown in the regular Figure 5e.**

a

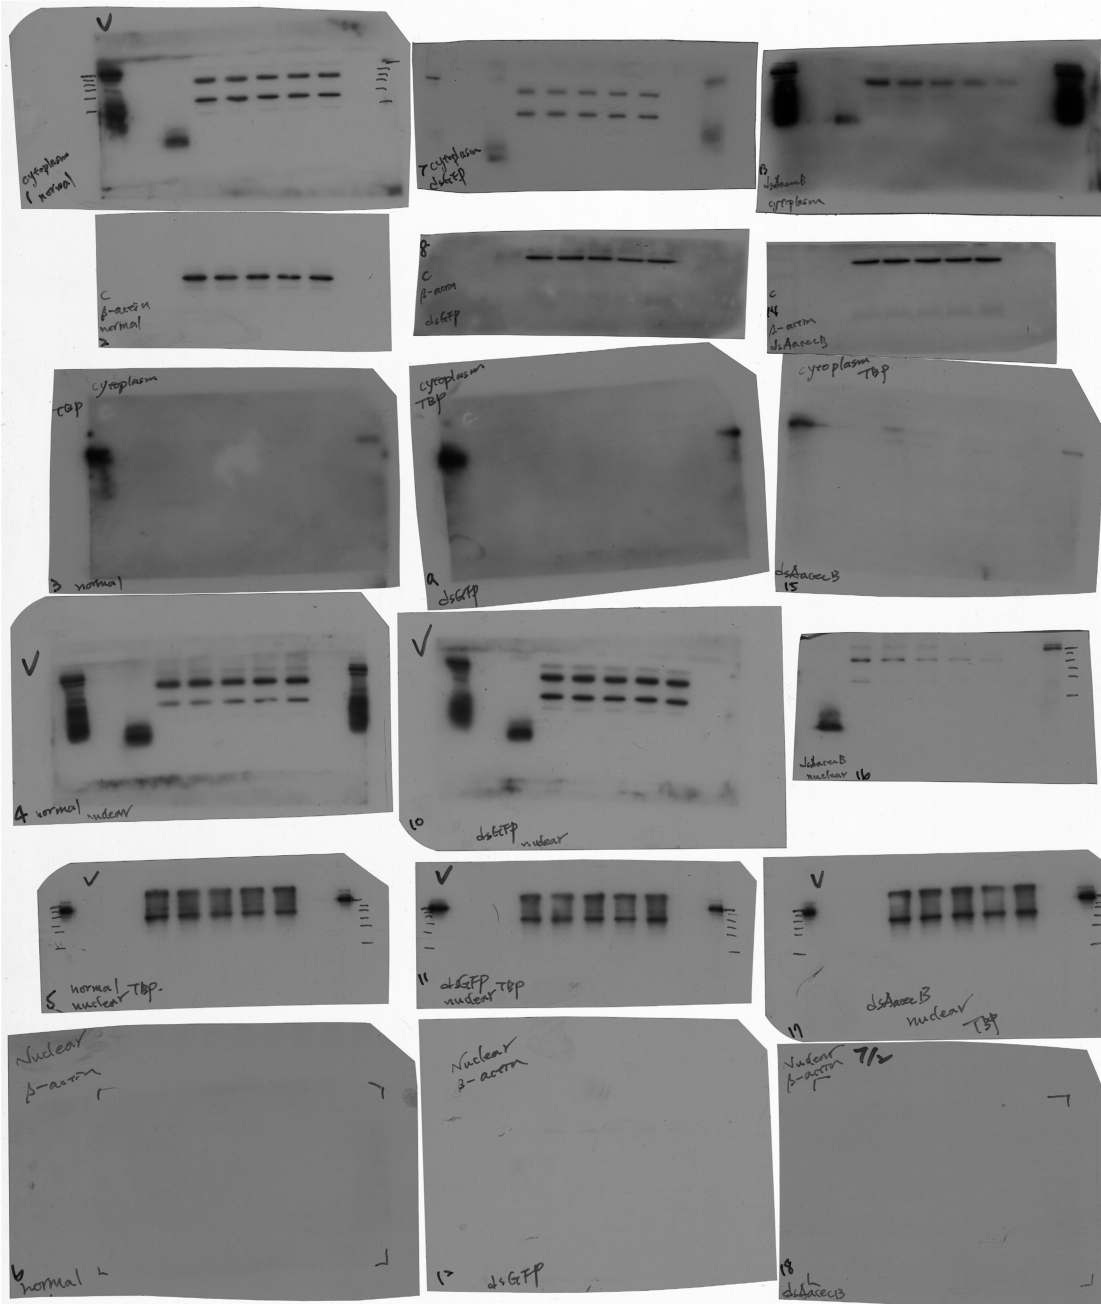

Supplementary Figure S4. Full length blots of the Western data shown in the regular Figures 6b and 6c.



Figure 7b

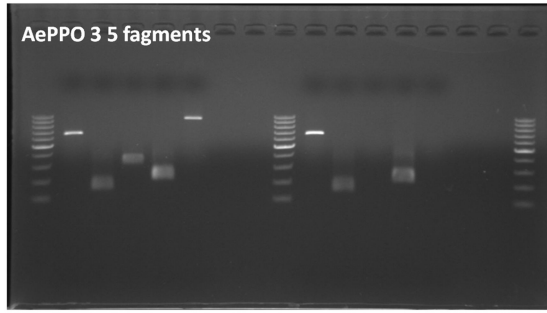

Figure 7c

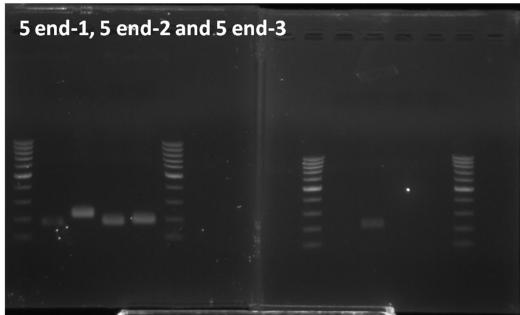

Figure 7d

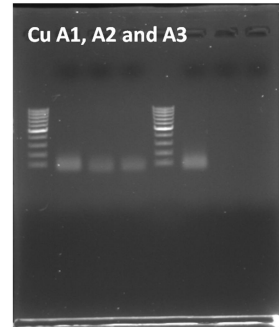

Figure 7e

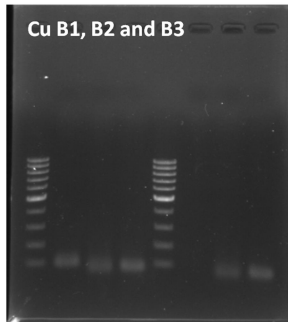

Figure 7f

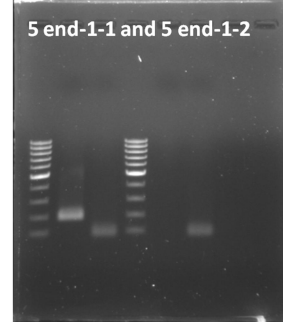

**Supplementary Figure S5. Full length gels of the PCR data shown in the regular Figures 7b-7f.**

a

Figure 8a

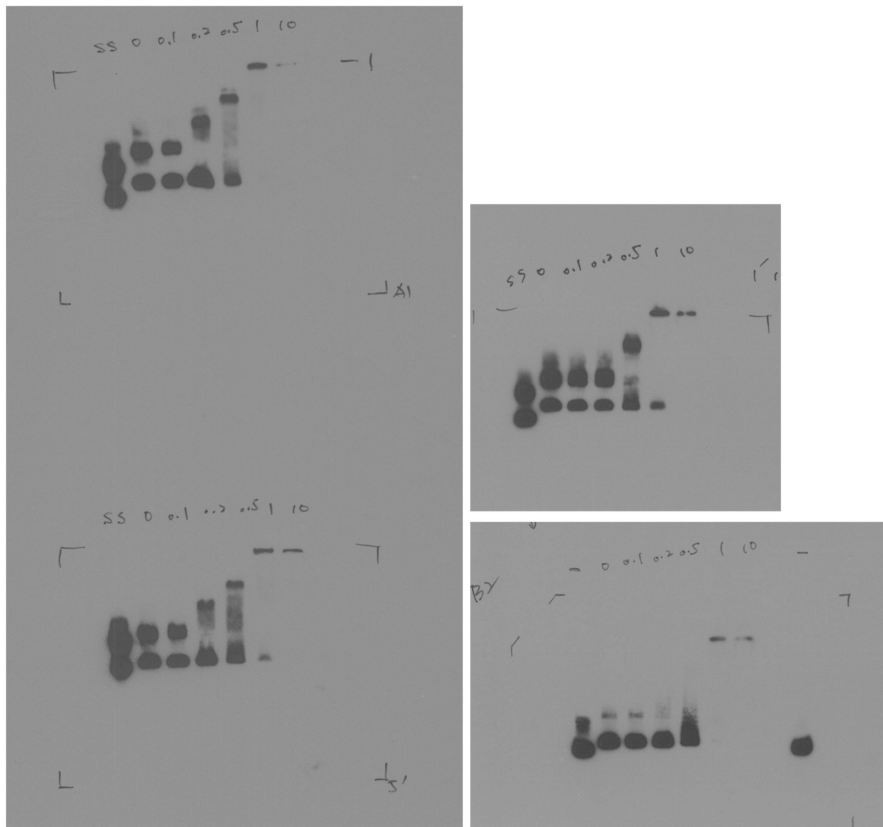

Figure 8b

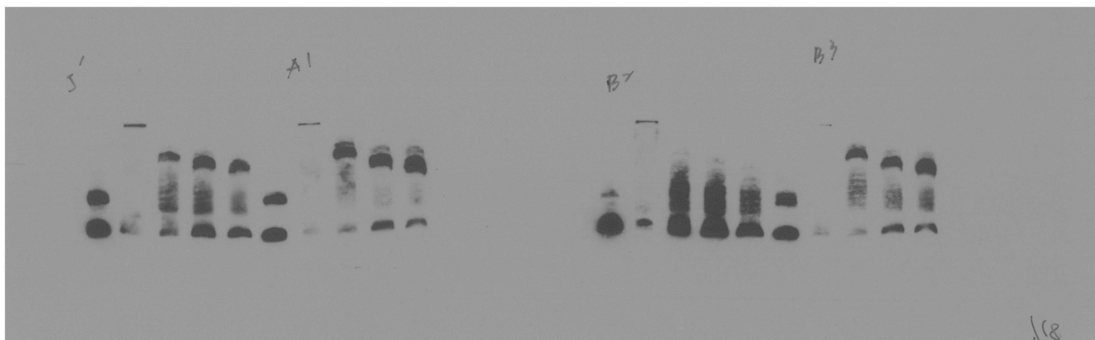

Figure 8c

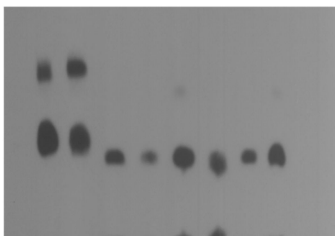

Supplementary Figure S6. (a) Full length blots of the EMSA data shown in the regular Figures 8a-8c.

**b**

**(i)**

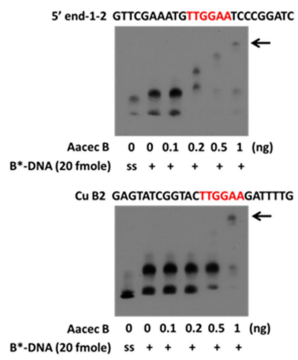

**(ii)**

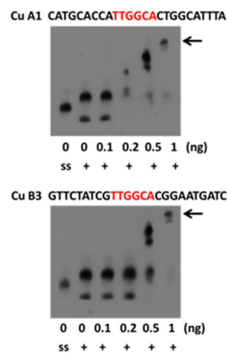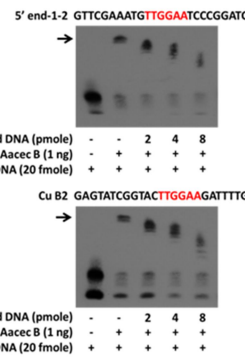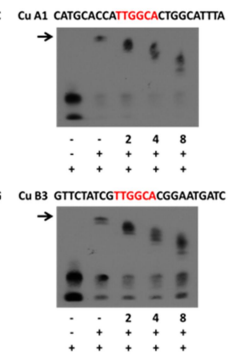

**(iii)**

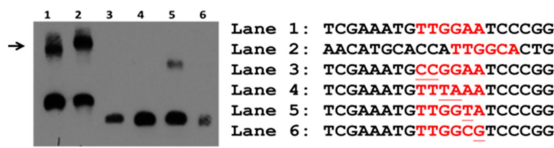

**c**

**(i)**

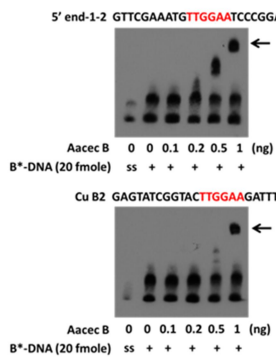

**(ii)**

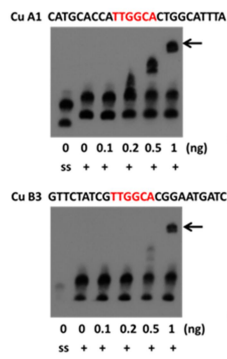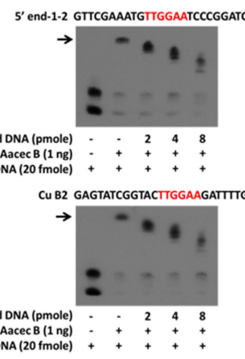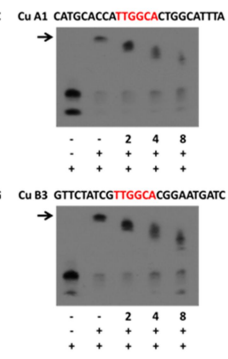

**(iii)**

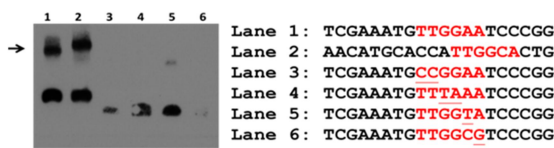

**Supplementary Figure S6 continued.** (b) and (c) show data from the other two biological replicates corresponding to experiments presented in Figures 8a-8c.

**AePPO 1**

5' end (position from +206 to +251 bp)  
CCGTATCCCGTCCGAAATG**TTGGAA**TACCGAGTATCGCTTTCGCC

Cu A (position from +700 to +746)  
ATCGGAGTCAATCTCCATC**ATTGGCATTGGCA**TTGGTATATCCAG

Cu B (position from +1289 to +1334 bp)  
ACGATCCTGAGGGTTCGCTT**CTGGAA**AGGGTACGGAGTTGTTGGAGA

**AePPO 4**

Cu A (position from +688 to +733 bp)  
AGGATATCGGCGTCAATCTACCA**CTGGCA**CTGGCATCTGGTGTA

Cu B (position from +8334 to +8379 bp)  
ACGATCCGGACA**ACTCGTTT**TTGGAAAGTTTCGGAGTAGTTGGGGA

Cu B (position from +8396 to +8441 bp)  
CGAGATCCAGTCTTCTACCG**TTGGCA**CCAACACATCGACGATATT

**Supplementary Figure S7. The nucleotide sequences of the AaPPO 1 and AaPPO 4 DNA fragments containing the TTGGAA and TTGGCA putative motifs. The TTGGAA and TTGGCA putative motif are indicated in red.**

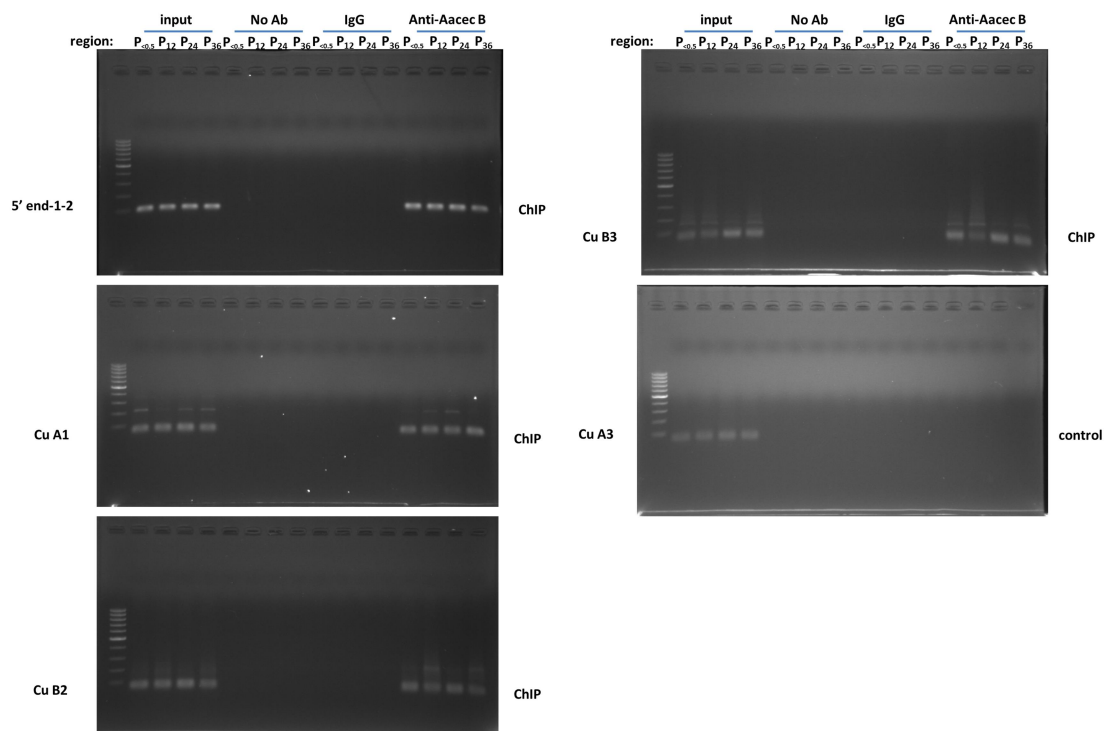

**Supplementary Figure S8. Full length gels of the PCR data shown in the regular Figures 8e.**

## Supplementary Table

**Supplementary Table S1. The number of proteins whose protein expression levels were reduced or enhanced in pupae after injection with Aacec B dsRNA**

| <b>Functional categories</b>              | <b>Reduced*</b> | <b>Enhanced*</b> | <b>Total</b> |
|-------------------------------------------|-----------------|------------------|--------------|
| <b>Information storage and processing</b> | <b>11</b>       | <b>10</b>        | <b>21</b>    |
| <b>Cellular processes and signaling</b>   | <b>9</b>        | <b>19</b>        | <b>28</b>    |
| <b>Metabolism</b>                         | <b>48</b>       | <b>28</b>        | <b>76</b>    |
| <b>Poorly characterized</b>               | <b>16</b>       | <b>3</b>         | <b>19</b>    |
| <b>Total</b>                              | <b>84</b>       | <b>60</b>        | <b>144</b>   |

\*: Compared with those in the uninjected control, the amount of each of the included proteins from the Aacec B dsRNA-injected pupae were either reduced by 2-fold or more, or enhanced by 2-fold or more.

**Supplementary Table S2. A list of the thirteen cuticle formation-related proteins the protein expression of which in pupae after injection with Aacec B dsRNA was either reduced or enhanced**

| Protein name                      | Accession swissprot | MW(kDa) | Spectral counting |           |               | Theoretical isoelectric point | Protein coverage (%) | up/down regulate* |
|-----------------------------------|---------------------|---------|-------------------|-----------|---------------|-------------------------------|----------------------|-------------------|
|                                   |                     |         | uninjected        | GFP dsRNA | Aacec B dsRNA |                               |                      |                   |
| AaPPO 1                           | Q9GYW1              | 78      | 11.836            | 8.384     | 5.789         | 6.59                          | 7.89                 | down              |
| AaPPO 3                           | Q16P46              | 78      | 1.39              | 0.86      | 0.641         | 6.46                          | 1.74                 | down              |
| AaPPO 4                           | Q174J3              | 79      | 2.612             | 2.286     | 1.238         | 6.67                          | 5.38                 | down              |
| chitinase II                      | Q17JL4              | 48      | 2.015             | 2.47      | 4.07          | 8.35                          | 13.38                | up                |
| chitinase II                      | Q17JL7              | 48      | 1.536             | 1.4       | 3.473         | 6.15                          | 19.95                | up                |
| Chitin binding protein            | Q16MN2              | 26      | 1.135             | 1.635     | 2.326         | 4.89                          | 23.08                | up                |
| Pupal cuticle protein 78E         | Q16TU0              | 15      | 0                 | 0.3       | 0.329         | 4.68                          | 31.76                | up                |
| Cuticle protein                   | Q16VF4              | 26      | 4.979             | 2.501     | 2.475         | 4.93                          | 20.76                | down              |
| Serine protease                   | Q17MA4              | 35      | 0.459             | 2.57      | 2.815         | 6.83                          | 14.89                | up                |
| Serine protease                   | Q1HRH0              | 39      | 0                 | 0.45      | 1.469         | 7.83                          | 12.43                | up                |
| Serine protease                   | Q17HP8              | 47      | 0.493             | 0.643     | 1.123         | 5.27                          | 7.48                 | up                |
| Serine protease inhibitor, Serpin | Q179E0              | 50      | 0.739             | 1.15      | 3.03          | 5.45                          | 18.57                | up                |
| Serine protease inhibitor, Serpin | Q16HB8              | 52      | 0                 | 0.3       | 0.329         | 5.46                          | 7.17                 | up                |

\*: Compared with those in uninjected pupae, the amount of protein was increased or decreased in the Aacec B dsRNA-injected pupae.

**Supplementary Table S3. Specific primer pairs used for RT-qPCR**

| <b>Primer name</b> | <b>Accession number</b> | <b>Primer sequence</b>    |
|--------------------|-------------------------|---------------------------|
| Aacec A-F          | AAEL000627              | ATTTCTCCTgATCgCCgTggCTg   |
| Aacec A-R          |                         | gAgCCTTCTCggCggCATTgAA    |
| Aacec B-F          | AAEL004223              | TTggTgCCACTATTCgAggA      |
| Aacec B-R          |                         | gAgCgCTgCCAaggATAACAA     |
| Aacec D-F          | AAEL000598              | gCTAggTCAAACCgAAgCAg      |
| Aacec D-R          |                         | TCCTACAACAACCgggAgAg      |
| Aacec E-F          | AAEL000611              | CgAAgCCggTggTCTgAAg       |
| Aacec E-R          |                         | ACTACgggAAgTgCTTTCTCA     |
| Aacec F-F          | AAEL000625              | gTgTTCAAAGCATCggAAAAAg    |
| Aacec F-R          |                         | gCTgACATTCACAATCTATCTCCg  |
| Aacec G-F          | AAEL015515              | TCACAAAgTTATTTCTCCTgATCg  |
| Aacec G-R          |                         | gCTTTAgCCCCAgCTACAAC      |
| Aacec H-F          | AAEL017211              | CTTCACCAAgCTgCTATTggT     |
| Aacec H-R          |                         | AACTTTTTTgCCAATCTTCTTCAgC |
| Aacec I-F          | AAEL000775              | ggCTATTcGTTTTcGTCATTTTC   |
| Aacec I-R          |                         | CTACgTTTTTgCCAgCCTTTTC    |
| Aacec J-F          | AAEL000777              | gCTATTcGTTTTcGTCATTTTTg   |
| Aacec J-R          |                         | CTTTTCAATCTTTTTgCCCAG     |
| Aacec N-F          | AAEL000621              | CggCAAgAAATTggAAAAAgTC    |
| Aacec N-R          |                         | gAATCgATCATCCTAgggCC      |
| AaS7-F             | XM_001660119            | gCTgAAgTCgTCggCAAgCgTAT   |
| AaS7-R             |                         | CgTCACgTCCggTCAgCTTCTT    |
| AaPPO 1-F          | AAEL013498              | gCATTgCTgCAGCgTCCTTT      |
| AaPPO 1-R          |                         | gggTCTCTgCATCgTCACTgAA    |
| AaPPO 3-F          | AAEL011763              | ATCTTTCCAAGcGCTTCTgCAACg  |
| AaPPO 3-R          |                         | ATTTCgACCTCCgCgCCAC       |
| AaPPO 4-F          | AAEL013501              | ACCCAggCgAgAATAATgTAgTgC  |
| AaPPO 4-R          |                         | CgCTCTCgggTTgATTggAC      |

**qPCR conditions:** 1. An initial step: 95°C for 3 min, 2. 40 cycles at 95°C for 15 s and 54°C for 30 s.



**Supplementary Table S4. Specific primer pairs used for RT-qPCR**

| <b>Primer name</b>          | <b>Accession number</b> | <b>Accession swisprot</b> | <b>Primer sequence</b>    |
|-----------------------------|-------------------------|---------------------------|---------------------------|
| Chitin binding protein-F    | XM_001662303            | Q16MN2                    | TgAAgTgTTTggTggTgTgTCg    |
| Chitin binding protein-R    |                         |                           | CTTCACACTTCACTCCACTCgAgTC |
| Pupal cuticle protein 78E-F | XM_001660599            | Q16TU0                    | AgCACAggTCTgATTCTgATgg    |
| Pupal cuticle protein 78E-R |                         |                           | CgTTgCTCgTTTCgTAggTA      |
| Cuticle protein-F           | XM_001660199            | Q16VF4                    | gTCAACTTTTgggCTgTCTggg    |
| Cuticle protein-R           |                         |                           | CCgCAAACACggCAATTAgAAC    |
| Serine protease-F           | XM_001647815            | Q1HRH0                    | ggTCgTTCTgAACgATTCgggATTC |
| Serine protease-R           |                         |                           | TgCACCCAACgTTgCCAATC      |
| Serpin-F                    | XM_001651181            | Q179E0                    | ACTggAgATTgggCgAAgCA      |
| Serpin-R                    |                         |                           | gCTgTCCTCgAAATggCTgAT     |

**qPCR conditions:** 1. An initial step: 95°C for 3 min, 2. 40 cycles at 95°C for 15 s and 54°C for 30 s.

**Supplementary Table S5. Specific primer pairs used for PCR**

| Primer name             | Primer sequence           |
|-------------------------|---------------------------|
| AaPPO 3 5' end--56-F    | TCTAATggTCACATATAAAAag    |
| AaPPO 3 5' end-1-F      | CCAATCTCCAATCgATAgCT      |
| AaPPO 3 5' end-689-R    | CTCTgTTCTggTTCgCgATC      |
| AaPPO3-5' end-55-F      | ATggCTgAgAgTAAATCTTTCCAAG |
| AaPPO3-5' end-157-R     | ACTCgTCCggAATTATgAgCgATgT |
| AaPPO3 5' end-274-F     | gTTATCgATCgTCgTggAgC      |
| AaPPO3 5' end-549-R     | CCgATgCTggATTgCCACCg      |
| AaPPO3 5' end-460-F     | CCAgACACTAAAgATgTACCgATT  |
| AaPPO3 5' end-690-R     | TCTCTgTTCTggTTCgCgAT      |
| AaPPO3-5' end-180-F     | gTTAgCTggCgATTTgCAgAgCagg |
| AaPPO3-5' end-183-R     | TAACggACgATAACgATCAC      |
| AaPPO3-5' end-273-R     | CTCCgCAAaggCAAgATCCg      |
| AaPPO 3 Cu A-691-F      | ATggCATACTTCCgTgAggA      |
| AaPPO 3 Cu A-840-R      | ATAACgAgAAATgATTTggC      |
| AaPPO 3 Cu A1-749-R     | ACTAAATgCCAgtgCCAATg      |
| AaPPO 3 Cu A2-750-F     | gTATCCTgCTgggggCgCCAC     |
| AaPPO 3 Cu A2-791-R     | CgATCTTTCTTAgCAATTC       |
| AaPPO 3 Cu A3-792-F     | CCgTggTgAACTTTTCTACT      |
| AaPPO 3 Cu A3-840-R     | ATAACgAgAAATgATTTggC      |
| AaPPO 3 inter-Cu-841-F  | AATgTggATCgATTCTgTAA      |
| AaPPO 3 inter-Cu-1189-R | gTCgATTCCTTTgACTTCAT      |
| AaPPO 3 Cu B-1190-F     | ATTTTAaggTgACTTggTTgAAg   |
| AaPPO 3 Cu B-1395-R     | AACAAGCCATCgATCATTCC      |
| AaPPO 3 Cu B1-1276-R    | CAAAAATCATgTCCAAAgt       |
| AaPPO 3 Cu B2-1277-F    | gCCTACATTACgATCCTgA       |
| AaPPO 3 Cu B2-1329-R    | CCCATTACTCCAAAATCTTC      |
| AaPPO 3 Cu B3-1330-F    | TgACgTgACAACggCAATgC      |
| AaPPO 3 Cu B3-1394-R    | ACAAGCCATCgATCATTCC       |
| AaPPO 3 3' end-1415-F   | CTAAACCCATACACTTCTAC      |
| AaPPO 3 3' end-2563-R   | CCgCATTACCATTTATggCagA    |
| AaPPO 3 5' end-235-F    | gTTCgAAATgTTggAATCCCggATC |
| AaPPO 3 5' end-259-R    | gATCCgggATTCCAACATTTcAAC  |
| AaPPO 3 Cu A1-723-F     | CATgCACCATTggCACTggCATTTA |
| AaPPO 3 Cu A1-747-R     | TAAATgCCAgtgCCAATggTgCATg |
| AaPPO 3 Cu B2-1295-F    | gAgTATCggTACTTggAagATTTTg |
| AaPPO 3 Cu B2-1319-R    | CAAAATCTTCCAAGTACCgATACTC |
| AaPPO 3 Cu B3-1360-F    | gTTCTATCgTTggCACggAATgATC |
| AaPPO 3 Cu B3-1384-R    | gATCATTCCgTgCCAACgATAgAAC |

**PCR conditions:** 94°C for 30 s, 53°C for 30 s, and 72°C for 30 s for 26 cycles with a final extension at 72°C for 2 min.

**Supplementary Table S6. The specific single-stranded oligonucleotides used for EMSA and qChIP assay.**

| <b>name</b>                       | <b>DNA sequence</b>        |
|-----------------------------------|----------------------------|
| AaPPO 3-5' end-1-2 F              | GTTCGAAATGTTGGAATCCCGGATC  |
| AaPPO 3-5' end-1-2 R              | GATCCGGGATTCCAACATTTCTGAAC |
| AaPPO 3-Cu A1 F                   | CATGCACCATTGGCACTGGCATTTA  |
| AaPPO 3-Cu A1 R                   | TAAATGCCAGTGCCAATGGTGCATG  |
| AaPPO 3-Cu B2 F                   | GAGTATCGGTACTTGGGAAGATTTTG |
| AaPPO 3-Cu B2 R                   | CAAAATCTTCCAAGTACCGATACTC  |
| AaPPO 3-Cu B3 F                   | GTTCTATCGTTGGCACGGAATGATC  |
| AaPPO 3-Cu B3 R                   | GATCATTCCGTGCCAACGATAGAAC  |
| TTGGCA-nucleotide replacement 1-F | TCGAAATGCCGGAATCCCGG       |
| TTGGCA-nucleotide replacement 1-R | CCGGGATTCCGGCATTTCGA       |
| TTGGCA-nucleotide replacement 2-F | TCGAAATGTTTAAATCCCGG       |
| TTGGCA-nucleotide replacement 2-R | CCGGGATTTAAACATTTTCGA      |
| TTGGCA-nucleotide replacement 3-F | TCGAAATGTTGGTATCCCGG       |
| TTGGCA-nucleotide replacement 3-R | CCGGGATACCAACATTTTCGA      |
| TTGGCA-nucleotide replacement 4-F | TCGAAATGTTGGCGTCCCGG       |
| TTGGCA-nucleotide replacement 4-R | CCGGGACGCCAACATTTTCGA      |

**qPCR conditions:** 1. An initial step: 95°C for 3 min, 2. 40 cycles at 95°C for 15 s and 54°C for 30 s.
